# Supplementary material
Source: PubMed Central journal article supplement (PMC6607401)
Supplement: nn8b07662_si_001.pdf [file nn8b07662_si_001.pdf]

## Supporting Information

### Polysaccharide Nanoparticles Can Efficiently Modulate the Immune Response Against an HIV Peptide Antigen

Tamara G. Dacoba<sup>†,‡,⊥</sup>, Robert W. Omange<sup>§,⊥</sup>, Hongzhao Li<sup>§</sup>, José Crecente-Campo<sup>†,‡</sup>, Ma Luo<sup>§,||</sup>, Maria Jose Alonso<sup>†,‡#</sup>

<sup>†</sup>Center for Research in Molecular Medicine and Chronic Diseases (CIMUS), Campus Vida, Universidade de Santiago de Compostela, Santiago de Compostela 15782, Spain.

<sup>‡</sup>Department of Pharmacology, Pharmacy and Pharmaceutical Technology, School of Pharmacy, Campus Vida, Universidade de Santiago de Compostela, Santiago de Compostela 15782, Spain.

<sup>°</sup>Department of Medical Microbiology and Infectious Diseases, University of Manitoba, Winnipeg, MB R3E 0J9, Canada.

<sup>||</sup>National Microbiology Laboratory, Public Health Agency of Canada, Winnipeg, MB R3E 3L5, Canada.

<sup>⊥</sup>These authors contributed equally to this work.

<sup>#</sup>Corresponding author e-mail address: mariaj.alonso@usc.es

**Keywords:** HIV vaccine; peptide antigen; polysaccharide; nanovaccine; poly(I:C); nanoparticle; antigen encapsulation

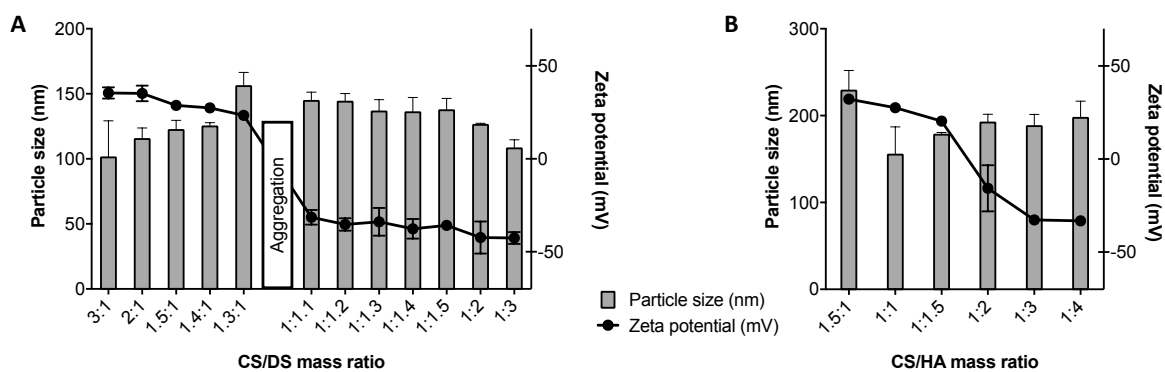

**Supporting Figure S1.** Evolution of particle size and zeta potential of blank (A) CS/DS NPs and (B) CS/HA NPs as the mass ratio of the negative polymer is increased. CS: chitosan, DS: dextran sulfate, NPs: nanoparticles, HA: hyaluronic acid.

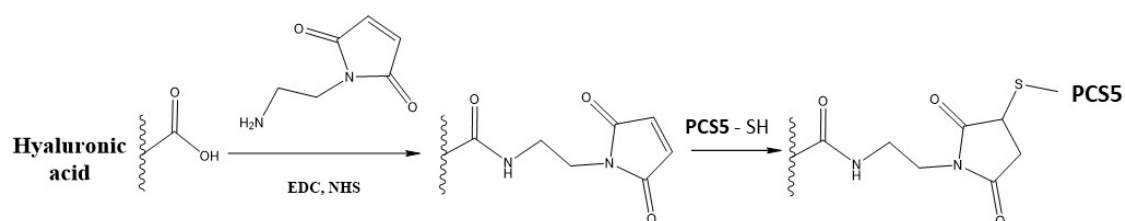

**Supporting Figure S2.** Preparation of the conjugate HA-PCS5 in a 2-step thiol-maleimide conjugation reaction.

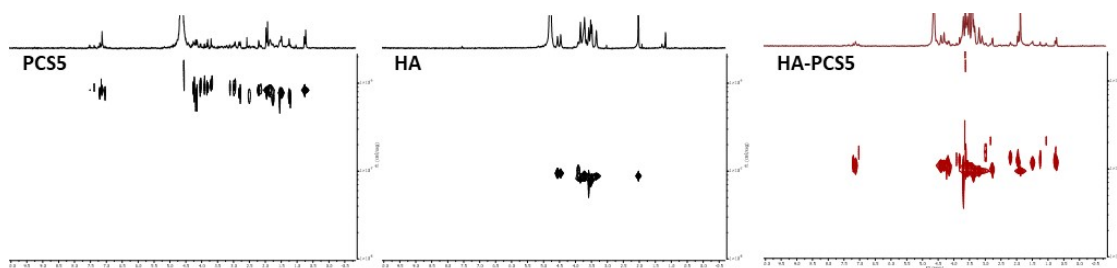

**Supporting Figure S3.** Diffusion-ordered spectroscopy (DOSY) spectra of PCS5, HA and HA-PCS5. PCS5: protease cleavage site 5, HA: hyaluronic acid.

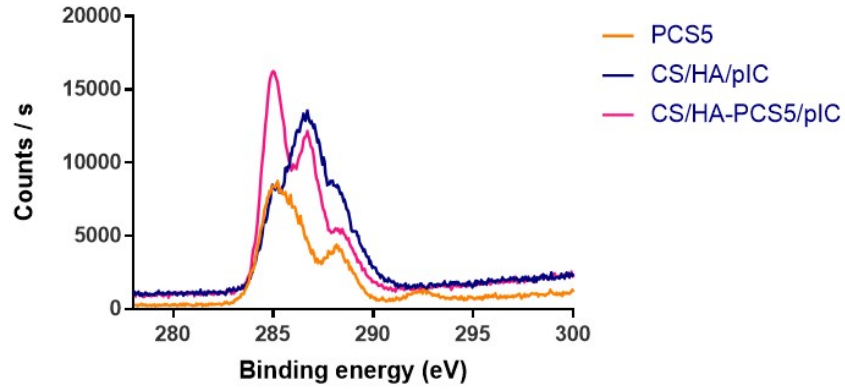

**Supporting Figure S4.** Carbon s<sub>1</sub> binding energies of PCS5 (orange), CS/HA/pIC NPs (blue) and CS/HA-PCS5/pIC NPs (pink). PCS5: protease cleavage site 5, CS: chitosan, HA: hyaluronic acid, pIC: poly(I:C) (polyinosinic:polycytidylic acid), NPs: nanoparticles.

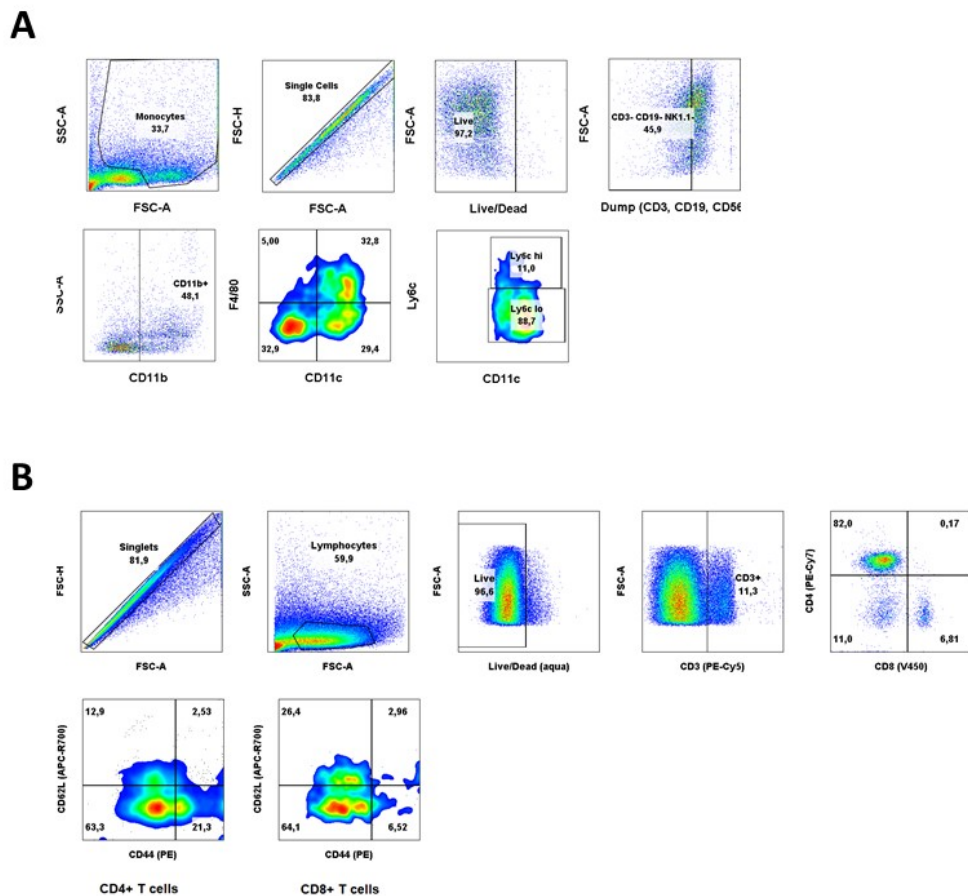

**Supporting Figure S5.** Multicolor flow gating of (A) monocytes Ly6c<sup>hi</sup> and Ly6c<sup>low</sup> and macrophages CD11b<sup>+</sup> CD11c<sup>-</sup> F4/80<sup>+</sup> and (B) central memory and effector memory T cells (CD44<sup>+</sup> CD62L<sup>+</sup> and CD44<sup>+</sup> CD62L<sup>-</sup>).

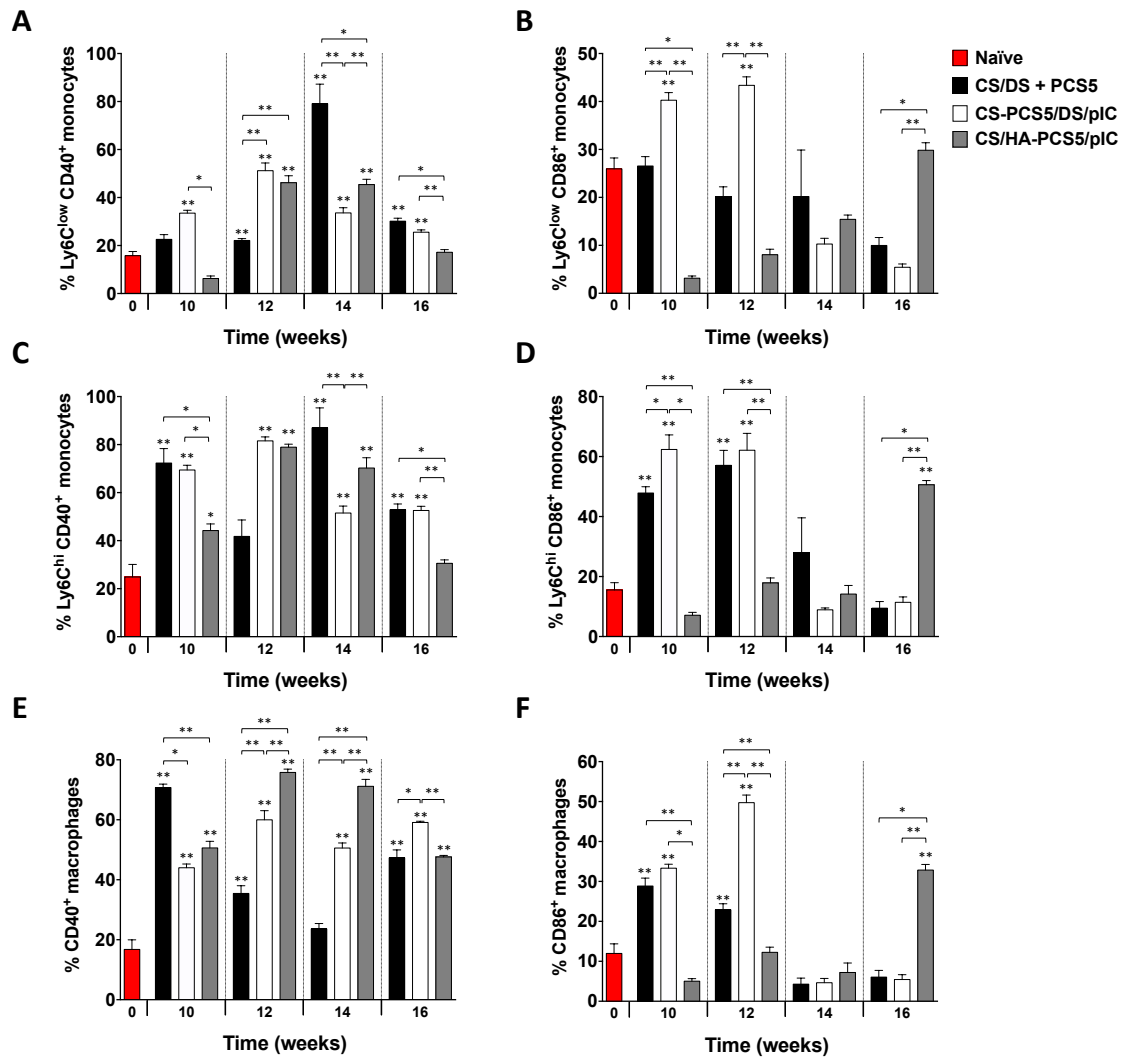

**Supporting Figure S6.** Monocyte and macrophage expression of co-stimulatory factors at 10, 12, 14 and 16 weeks post prime. CD40<sup>+</sup> and CD86<sup>+</sup> expression in (A-B) Ly6C<sup>low</sup> monocytes; (C-D) Ly6C<sup>high</sup> monocytes and (E-F) macrophages was quantified by multicolor flow cytometry of splenocytes obtained from non-treated naïve (red bars) and NP-vaccinated mice: CS/DS + PCS5 (black bars), CS-PCS5/DS/pIC (white bars) or CS/HA-PCS5/pIC (gray bars). Values represent mean  $\pm$  SEM ( $n \geq 3$ ). Statistical comparison between groups was done using a Mann-Whitney test. Significant statistical differences are represented as \* ( $p < 0.05$ ) and \*\* ( $p < 0.01$ ) for comparison between groups and to naïve mice. NPs: nanoparticles, CS: chitosan, DS: dextran sulfate, PCS5: protease cleavage site 5, pIC: poly(I:C) (polyinosinic:polycytidylic acid), HA: hyaluronic acid.

**Supporting Table S1.** Elemental composition (%) by XPS of the surface of CS, HA, PCS5, blank CS/HA/pIC NPs and loaded CS/HA-PCS5/pIC NPs.

| <b>Sample</b>             | <b>C</b> | <b>O</b> | <b>N</b> | <b>Cl</b> | <b>Mg</b> | <b>F</b> | <b>Na</b> | <b>S</b> | <b>C/O</b> | <b>C/N</b> |
|---------------------------|----------|----------|----------|-----------|-----------|----------|-----------|----------|------------|------------|
| <b>Chitosan</b>           | 50.53    | 32.78    | 7.46     | 6.18      | 2.75      | 0.30     | -         | -        | 1.54       | 6.77       |
| <b>Hyaluronic acid</b>    | 51.73    | 34.87    | 3.95     | 0.45      | 0.71      | 5.42     | 5.88      | -        | 1.48       | 13.10      |
| <b>PCS5</b>               | 58.49    | 16.72    | 15.96    | -         | -         | 6.79     | -         | 2.05     | 3.50       | 3.66       |
| <b>CS/HA/pIC NPs</b>      | 55.19    | 29.38    | 4.29     | 2.05      | -         | -        | 4.56      | 0.28     | 1.87       | 12.86      |
| <b>CS/HA-PCS5/pIC NPs</b> | 65.51    | 20.52    | 7.04     | 3.67      | -         | 0.39     | 1.72      | 1.15     | 3.19       | 9.31       |

Key: CS, chitosan; HA, hyaluronic acid; PCS5, protease cleavage site 5; pIC, poly(I:C); NPs, nanoparticles.
